# Supplementary material for: Rapid quantitative analysis of SVOCs in indoor surface film using Direct Analysis in Real Time mass spectrometry: A case study on phthalates
Source: Copernicus journal article supplement (doi:10.5194/amt-2024-104), 2024-06-27
Supplement: Supplementary file 1 [file amt-2024-104-supplement.pdf]

1

## Supplementary Information (SI)

2 **Rapid quantitative analysis of SVOCs in indoor surface**  
3 **film using Direct Analysis in Real Time mass**  
4 **spectrometry: A case study on phthalates**

5 Ying Zhou<sup>1,2</sup>, Longkun He<sup>1</sup>, Jiang Tan<sup>3</sup>, Jiang Zhou<sup>3,\*</sup>, Yingjun Liu<sup>1,4,\*</sup>

6 <sup>1</sup> SKL-ESPC & SEPKL-AERM, College of Environmental Sciences and Engineering, Peking University,  
7 Beijing, 100871, China

8 <sup>2</sup> West China School of Public Health and West China Fourth Hospital, Sichuan University, Chengdu,  
9 Sichuan 610041, China

10 <sup>3</sup> Beijing National Laboratory for Molecular Sciences, Analytical Instrumentation Center, College of  
11 Chemistry and Molecular Engineering, Peking University, Beijing, 100871, China

12 <sup>4</sup> Center for Environment and Health, Peking University, Beijing 100871, China

13 \* *Correspondence to:* Yingjun Liu (yingjun.liu@pku.edu.cn), Jiang Zhou (zhoujiang@pku.edu.cn)

14 Number of pages: 4

15 Number of figures: 2

16 Number of tables: 2

17

## Table of Contents

### 18 **Supplementary tables**

19 **Table S1** The optimized MS/MS acquisition parameters of the selected phthalates.

20 **Table S2** The optimized DAR-MS/MS acquisition parameters, regression equations and correlation  
21 coefficients for calibration curves for the four selected PAEs spiked on glass capillaries.

### 22 **Supplementary figures**

23 **Fig. S1** (a) DART-MS/MS set up during analysis. (b) Metal holder with six glass capillary tubes.

24 The center-to-center distance between two glass capillary tubes is 20 mm.

25 **Fig. S2** Temperature variations of the extracted ion chromatograms (XIC) obtained from 5  
26 capillaries samples for spiked DEHP within 4 minutes.

27

28 **Table S1** The optimized MS/MS acquisition parameters of the selected phthalates.

| Compounds | Precursor ions<br>( <i>m/z</i> ) | Product ions<br>( <i>m/z</i> ) | DP<br>(volts) | CE<br>(volts) |
|-----------|----------------------------------|--------------------------------|---------------|---------------|
| DEHP/DnOP | 391.3                            | 113.0                          | 55            | 14            |
|           |                                  | 149.1                          | 55            | 23            |
|           |                                  | 167.2                          | 55            | 14            |
|           |                                  | 261.1                          | 55            | 11            |
|           |                                  | 279.1                          | 55            | 11            |
| DiBP/DnBP | 279.2                            | 57.3                           | 55            | 13            |
|           |                                  | 149.1                          | 55            | 20            |
|           |                                  | 205.0                          | 55            | 9             |

29 a: DP: declustering potential.

30 b: CE: collision energy.

31

32 **Table S2** The optimized DAR-MS/MS acquisition parameters, regression equations and  
 33 correlation coefficients for calibration curves for the four selected PAEs spiked on glass  
 34 capillaries.

| Compounds | Precursor ions<br>( <i>m/z</i> ) | Product ions <sup>a</sup><br>( <i>m/z</i> ) | Calibration | r     |
|-----------|----------------------------------|---------------------------------------------|-------------|-------|
| DEHP      | 391.3                            | 113.0                                       | y=244710 x  | 0.997 |
|           |                                  | 149.1                                       | y=553054x   | 0.981 |
|           |                                  | 167.2                                       | y=320202x   | 0.996 |
|           |                                  | 279.1                                       | y=159683x   | 0.997 |
| DnOP      | 391.3                            | 149.1                                       | y=470837x   | 0.993 |
|           |                                  | 261.1                                       | y=137084x   | 0.992 |
| DiBP      | 279.2                            | 57.3                                        | y=246187x   | 0.993 |
|           |                                  | 149.1                                       | \           |       |
|           |                                  | 205.0                                       | y=889277x   | 0.992 |
| DnBP/DBP  | 279.2                            | 149.1                                       | \           |       |
|           |                                  | 205.0                                       | y=760974x   | 0.993 |

35 **a:** Due to the intensities of some product ions being less than 8.5 % max intensities, data were  
 36 not included.

37

38

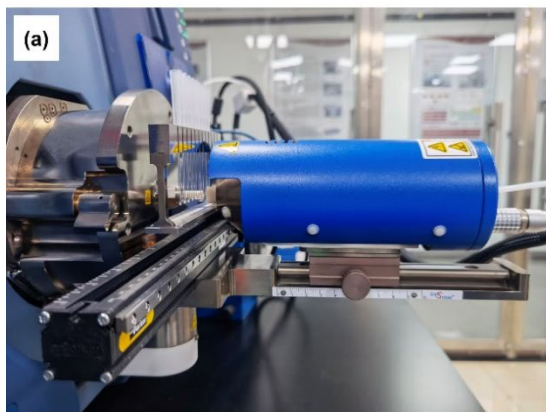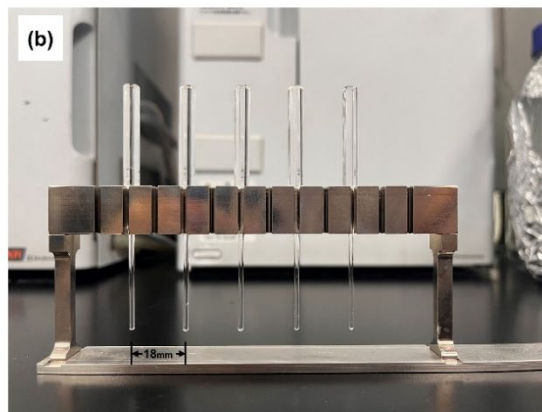

39

40 **Figure S1** (a) DART-MS/MS set up during analysis. (b) Metal holder with six glass capillary tubes

41 on a stainless steel stand. The center-to-center distance between two glass capillary tubes is 18 mm.

42

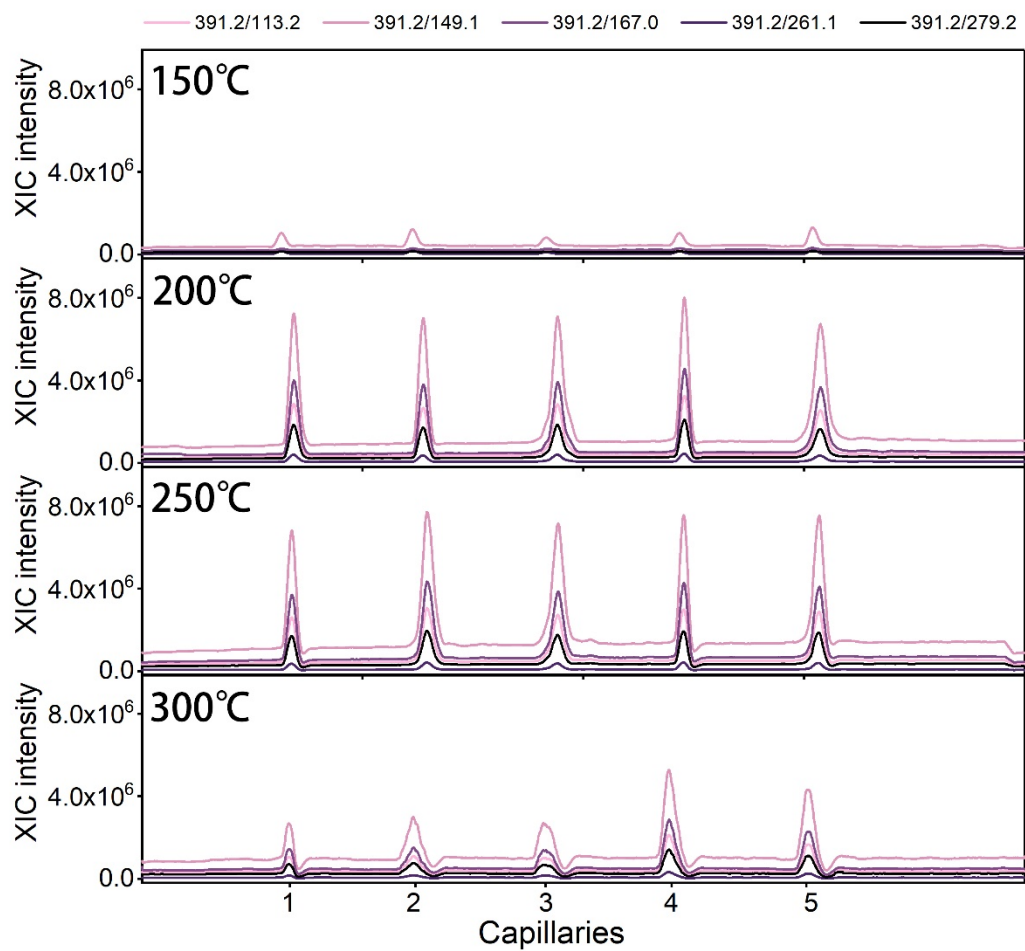

43

44 **Figure S2** Temperature variations of the extracted ion chromatograms (XIC) obtained from 5  
 45 capillaries samples for spiked DEHP within 4 minutes. The He flux temperature was set at 150 °C,  
 46 200 °C, 250 °C, and 300 °C due to the boiling points of DEHP were 384 °C.

47

48
